# Supplementary material for: High prevalence of antibiotic resistance in commensal Escherichia coli from healthy human sources in community settings
Source: PubMed Central journal article supplement (PMC7873077; doi:10.1038/s41598-021-82693-4), 2021-02-09
Supplement: 41598_2021_82693_MOESM1_ESM.pdf [file 41598_2021_82693_MOESM1_ESM.pdf]

## **High prevalence of antibiotic resistance in commensal *Escherichia coli* from healthy human sources in community settings**

Emmanuel Nji<sup>1,\*</sup>, Joseph Kazibwe<sup>2</sup>, Thomas Hambridge<sup>3</sup>, Carolyn Alia Joko<sup>1,4</sup>, Amma Aboagyewa Larbi<sup>1,5</sup>, Lois Afua Okyerewaa Damp<sup>6</sup>, Nana Adoma Nkansa-Gyamfi<sup>1</sup>, Cecilia Stålsby Lundborg<sup>7</sup>, La Thi Quynh Lien<sup>7,8</sup>.

<sup>1</sup>BioStruct-Africa, Vårby, SE-143 43, Stockholm, Sweden.

<sup>2</sup>Department of Infectious Disease Epidemiology, Imperial College London, UK.

<sup>3</sup>Department of Public Health, Erasmus MC, University Medical Center Rotterdam, 3015 GD Rotterdam, Netherlands.

<sup>4</sup>Faculty of Science and Engineering, Åbo Akademi University, Turku, Finland.

<sup>5</sup>Department of Biochemistry and Biotechnology, College of Science, Kwame Nkrumah University of Science and Technology, PMB, Kumasi, Ghana.

<sup>6</sup>The Open University, School of Engineering and Innovation, Walton Hall, Milton Keynes, MK7 6AA, UK.

<sup>7</sup>Health Systems and Policy (HSP): Improving the Use of Medicines, Department of Global Public Health, Karolinska Institutet, Tomtebodavägen 18A, 17177 Stockholm, Sweden.

<sup>8</sup>Department of Pharmaceutical Management and Pharmaco-Economics, Hanoi University of Pharmacy, 13-15 Le Thanh Tong, Hoan Kiem District, 110403 Hanoi, Vietnam.

\*Correspondence: Email: emmanuel.nji@biostructafrica.org, Tel: 0046720185443

**Supplementary Table 1. Details of the search strategy used for the different databases.**

| Database            | Search words                                                                                                                                                                                                                                                                                                                                                                                                                                                                                                                                                                                                                                                            | Articles |
|---------------------|-------------------------------------------------------------------------------------------------------------------------------------------------------------------------------------------------------------------------------------------------------------------------------------------------------------------------------------------------------------------------------------------------------------------------------------------------------------------------------------------------------------------------------------------------------------------------------------------------------------------------------------------------------------------------|----------|
| PubMed              | ((((Escherichia coli[MeSH Terms]) OR E. coli[Title/Abstract]) OR Enterobacteriaceae[Title/Abstract])) AND (((((((Prevalence[MeSH Terms]) OR prevalence[Title/Abstract]) OR incidence[Title/Abstract]) OR morbidity[Title/Abstract]) OR odd ratio[Title/Abstract]) OR confidence interval[Title/Abstract]) OR risk ratio[Title/Abstract]) OR rate[Title/Abstract]) OR p value[Title/Abstract])) AND ((((((antibiotic resistance[MeSH Terms]) OR antibiotic resistance[Title/Abstract]) OR antimicrobial resistance[MeSH Terms]) OR antimicrobial resistance[Title/Abstract]) OR "drug resistance"[MeSH Terms]) OR "drug resistance"[Title/Abstract]) AND English[lang])) | 3634     |
| EMBASE +<br>MEDLINE | ('escherichia coli':ab,ti OR 'e. coli':ab,ti 'enterobacteriaceae':ab,ti) AND ('antibiotic resistance':ab,ti OR 'antimicrobial resistance':ab,ti OR 'drug resistance':ab,ti) AND ('prevalence':ab,ti OR 'incidence':ab,ti OR 'morbidity':ab,ti OR 'odd ratio':ab,ti OR 'risk ratio':ab,ti OR 'confidence interval':ab,ti OR 'p value':ab,ti OR 'rate':ab,ti)                                                                                                                                                                                                                                                                                                             | 2107     |
| WEB OF<br>SCIENCE   | <i>(E. coli</i> OR <i>Escherichia coli</i> OR Enterobacteriaceae) AND <b>TOPIC:</b> (Antibiotic resistance OR antimicrobial resistance OR drug resistance) AND <b>TOPIC:</b> (Prevalence OR Incidence OR Morbidity OR Odd ratio OR Risk ratio OR Confidence interval OR P value OR rate) AND <b>TOPIC:</b> (HUMAN* OR INFANT* OR CHILD* OR ADOLESCEN* OR MALE* OR FEMALE)                                                                                                                                                                                                                                                                                               | 3616     |
| CINAHL              | TI ( <i>E. coli</i> OR <i>Escherichia coli</i> OR Enterobacteriaceae ) OR AB ( <i>E. coli</i> OR <i>Escherichia coli</i> OR Enterobacteriaceae) AND TI ( Antibiotic resistance OR antimicrobial resistance OR drug resistance ) OR AB ( Antibiotic resistance OR antimicrobial resistance OR drug resistance ) AND TI ( Prevalence OR Incidence OR Morbidity OR Odd ratio OR Risk ratio OR Confidence interval OR P value OR rate ) OR AB ( Prevalence OR Incidence OR Morbidity OR Odd ratio OR Risk ratio OR Confidence interval OR P value OR rate ).                                                                                                                | 290      |
| COCHRANE<br>LIBRARY | <i>E. coli</i> OR <i>Escherichia coli</i> OR Enterobacteriaceae in Title, Abstract, Keywords and Antibiotic resistance OR antimicrobial resistance OR drug resistance in Title, Abstract, Keywords and Prevalence OR Incidence OR Morbidity OR Odd ratio OR Risk ratio OR Confidence interval OR P value OR rate in Title, Abstract, Keywords and HUMAN*                                                                                                                                                                                                                                                                                                                | 289      |

**Supplementary Table 2. Key information extracted from the studies.**

| General information | Study characteristics | Participant characteristics | Measurement tools/methods used in the study  | Outcome of interest                                                                |
|---------------------|-----------------------|-----------------------------|----------------------------------------------|------------------------------------------------------------------------------------|
| First author        | Study design          | Age                         | Method used to control bias                  | Prevalence of antibiotic resistance (%)                                            |
| Year of publication | Study duration        | Gender                      | Method used to detect <i>E. coli</i> species | Factors associated with the carriage of resistance (OR, RR, rate, 95% CI, p-value) |
| Journal             | Number of isolates    | Geographical location       | Methods used to detect resistance            |                                                                                    |
| Country of origin   | Sample size           | Ethnicity                   |                                              |                                                                                    |
| PubMed ID           |                       | Socio-economic status       |                                              |                                                                                    |

**Supplementary Table 3. Reference scale used for accessing the quality of evidence of the selected studies.<sup>1,2</sup> Polymerase chain reaction (PCR), plasmid transfer assay (PTA), pulsed field gel electrophoresis (PFGE), nucleic acid sequencing, and mass spectrometry, detects the presence of resistant genes while disc diffusion/synergy test determines the expression of resistant genes.**

| Grade  | Criteria    |                                                                                                                                                                                                 |
|--------|-------------|-------------------------------------------------------------------------------------------------------------------------------------------------------------------------------------------------|
| High   | Method      | Disc diffusion/synergy test and PCR<br>Disc diffusion/synergy test and PTA<br>Disc diffusion/synergy test and PFGE<br>Disc diffusion/synergy test and nucleic acid sequencing/mass spectrometry |
|        | Sample size | >15                                                                                                                                                                                             |
|        | Analysis    | Data set completely analysed                                                                                                                                                                    |
| Medium |             | Combination of criteria from high and low (e.g., sample size <15 but uses Disc diffusion/synergy test and PCR)                                                                                  |
| Low    | Method      | Disc diffusion/synergy test                                                                                                                                                                     |
|        | Sample size | <15                                                                                                                                                                                             |
|        | Analysis    | Data set partly analysed                                                                                                                                                                        |

**Supplementary Table 4. Prevalence of antibiotic resistance in commensal *E. coli* isolated from human sources in community settings in low- and middle-income countries.**

| Antibiotics                 | Mechanism of inhibition | Study number | Total number of isolates | Number of resistant isolates | Pooled prevalence (%) | Lower bound 95% CI | Upper bound 95% CI | Quality of the evidence (study number) | Reference         |
|-----------------------------|-------------------------|--------------|--------------------------|------------------------------|-----------------------|--------------------|--------------------|----------------------------------------|-------------------|
| Amikacin                    | Protein synthesis       | 12           | 6849                     | 254                          | 4                     | 1                  | 7                  | High (7), medium (5), low (0)          | 3–13              |
| Amoxicilin                  | Protein synthesis       | 1            | 161                      | 69                           | 43                    | 35                 | 50                 | High (0), medium (1), low (0)          | 14                |
| Amoxicillin/clavulanic acid | Cell wall synthesis     | 4            | 900                      | 222                          | 13                    | 1                  | 32                 | High (3), medium (1), low (0)          | 30,38,40,51       |
| Ampicillin/sulbactam        | Cell wall synthesis     | 2            | 427                      | 136                          | 30                    | 26                 | 34                 | High (1), medium (1), low (0)          | 3,8               |
| Apramycin                   | Protein synthesis       | 1            | 161                      | 0                            | 0                     | 0                  | 1                  | High (0), medium (1), low (0)          | 14                |
| Azithromycin                | Protein synthesis       | 1            | 87                       | 10                           | 11                    | 5                  | 19                 | High (0), medium (1), low (0)          | 17                |
| Aztreonam                   | Cell wall synthesis     | 2            | 258                      | 8                            | 3                     | 1                  | 6                  | High (2), medium (0), low (0)          | 3,7               |
| Carbenicillin               | Cell wall synthesis     | 1            | 108                      | 22                           | 20                    | 14                 | 29                 | High (1), medium (0), low (0)          | 7                 |
| Cefazolin                   | Cell wall synthesis     | 3            | 1490                     | 141                          | 8                     | 4                  | 14                 | High (1), medium (2), low (0)          | 3,5,18            |
| Cefepime                    | Cell wall synthesis     | 3            | 5443                     | 2017                         | 17                    | 1                  | 43                 | High (1), medium (2), low (0)          | 3,4,9             |
| Cefixime                    | Cell wall synthesis     | 1            | 277                      | 166                          | 60                    | 54                 | 66                 | High (0), medium (1), low (0)          | 8                 |
| Cefoxitin                   | Cell wall synthesis     | 6            | 1371                     | 528                          | 18                    | 0                  | 62                 | High (4), medium (2), low (0)          | 18,30,35,43,50,51 |
| Ceftazidime                 | Cell wall synthesis     | 11           | 6445                     | 3070                         | 28                    | 12                 | 48                 | High (7), medium (4), low (0)          | 3–5,7,9,13,19–22  |
| Ceftiofur                   | Cell wall synthesis     | 1            | 7                        | 0                            | 0                     | 0                  | 35                 | High (1), medium (0), low (0)          | 12                |
| Ceftriaxone                 | Cell wall synthesis     | 7            | 1951                     | 587                          | 25                    | 3                  | 56                 | High (3), medium (4), low (0)          | 30,33,36,41–43,53 |
| Cefuroxime                  | Cell wall synthesis     | 3            | 535                      | 185                          | 31                    | 8                  | 61                 | High (2), medium (1), low (0)          | 3,7,8             |

|                         |                        |    |      |      |    |    |    |                                |                            |
|-------------------------|------------------------|----|------|------|----|----|----|--------------------------------|----------------------------|
| Cephalothin             | Cell wall synthesis    | 4  | 404  | 69   | 26 | 22 | 31 | High (1), medium (1), low (0)  | 11,15                      |
| Colistin                | Cell wall synthesis    | 2  | 4764 | 91   | 2  | 1  | 2  | High (1), medium (1), low (0)  | 9,13                       |
| Doxycycline             | Protein synthesis      | 1  | 54   | 22   | 41 | 28 | 54 | High (0), medium (1), low (0)  | 23                         |
| Enrofloxacin            | Nucleic acid synthesis | 1  | 54   | 10   | 18 | 9  | 30 | High (0), medium (1), low (0)  | 23                         |
| Flumequine              | Nucleic acid synthesis | 1  | 161  | 0    | 0  | 0  | 1  | High (0), medium (1), low (0)  | 14                         |
| Fosfomicin              | Cell wall synthesis    | 2  | 157  | 27   | 25 | 2  | 60 | High (1), medium (1), low (0)  | 21,23                      |
| Gentamicin              | Protein synthesis      | 16 | 8380 | 515  | 9  | 6  | 13 | High (10), medium (6), low (0) | 4-7,9-13,15,18,20-22,27,28 |
| Imipenem                | Cell wall synthesis    | 8  | 5747 | 317  | 1  | 0  | 4  | High (4), medium (4), low (0)  | 3-5,7,9,15,20,29           |
| Kanamycin               | Protein synthesis      | 6  | 389  | 48   | 16 | 7  | 27 | High (6), medium (0), low (0)  | 3,6,10,12,21,28            |
| Meropenem               | Cell wall synthesis    | 1  | 4764 | 434  | 9  | 8  | 10 | High (0), medium (1), low (0)  | 9                          |
| Neomycin                | Protein synthesis      | 1  | 161  | 6    | 4  | 1  | 7  | High (0), medium (1), low (0)  | 14                         |
| Nitrofurantoin          | Nucleic acid synthesis | 4  | 5301 | 279  | 3  | 1  | 6  | High (3), medium (2), low (0)  | 7,9-11,13                  |
| Norfloxacin             | Nucleic acid synthesis | 3  | 1047 | 295  | 36 | 15 | 60 | High (0), medium (3), low (0)  | 4,8,24                     |
| Penicillin              | Cell wall synthesis    | 1  | 87   | 41   | 47 | 37 | 57 | High (0), medium (1), low (0)  | 17                         |
| Piperacillin            | Cell wall synthesis    | 2  | 850  | 343  | 40 | 27 | 53 | High (0), medium (2), low (0)  | 4,11                       |
| Piperacillin/tazobactam | Cell wall synthesis    | 2  | 637  | 13   | 2  | 1  | 7  | High (1), medium (1), low (0)  | 4,7                        |
| Spectinomycin           | Protein synthesis      | 3  | 430  | 176  | 2  | 1  | 4  | High (1), medium (1), low (1)  | 6,30,31                    |
| Sulfamethoxazole        | Folate synthesis       | 6  | 5715 | 2609 | 53 | 45 | 60 | High (2), medium (3), low (1)  | 9,12,14,23,25,30           |

|                    |                   |   |      |     |    |    |    |                               |          |
|--------------------|-------------------|---|------|-----|----|----|----|-------------------------------|----------|
| Sulphonamide class | Folate synthesis  | 4 | 1399 | 858 | 63 | 56 | 70 | High (3), medium (1), low (0) | 15,31-33 |
| Tigecycline        | Protein synthesis | 1 | 4764 | 24  | 0  | 0  | 1  | High (0), medium (1), low (0) | 9        |
| Tobramycin         | Protein synthesis | 1 | 158  | 20  | 8  | 4  | 13 | High (1), medium (0), low (0) | 10       |

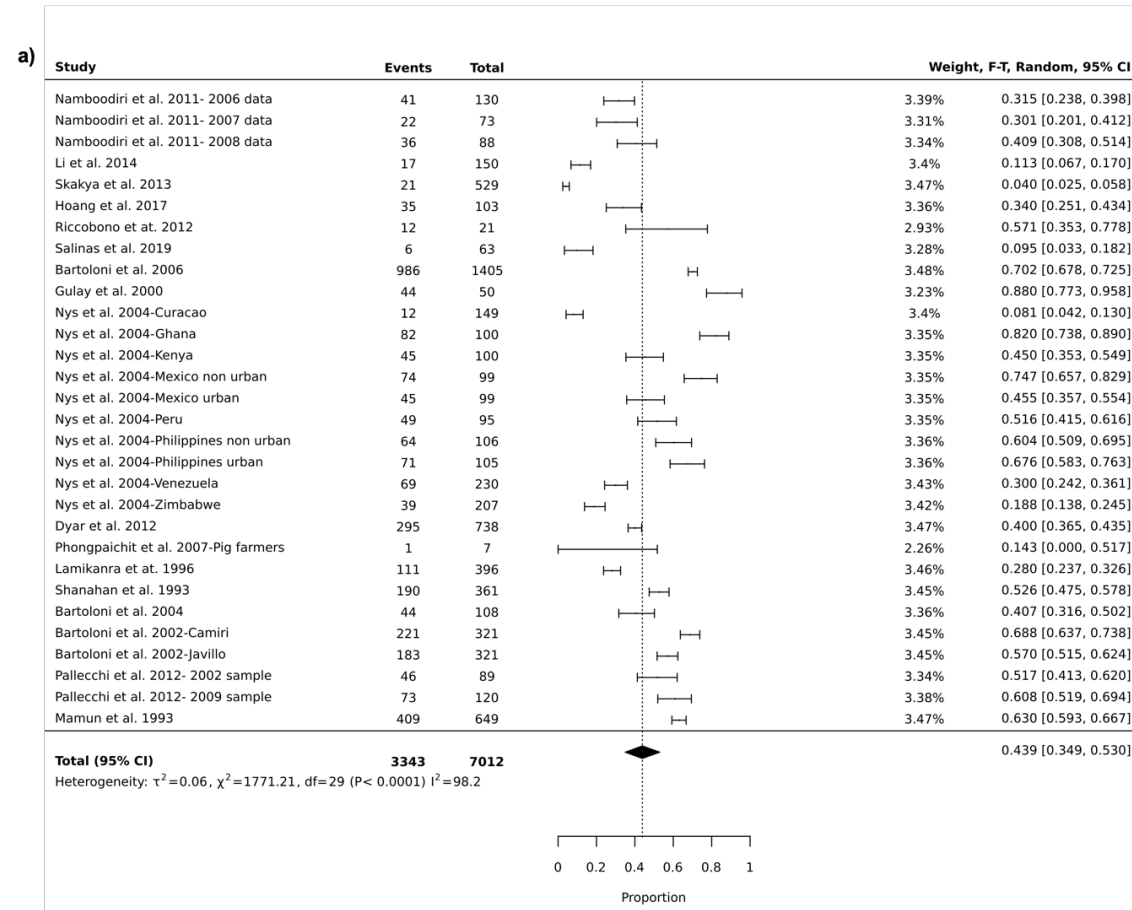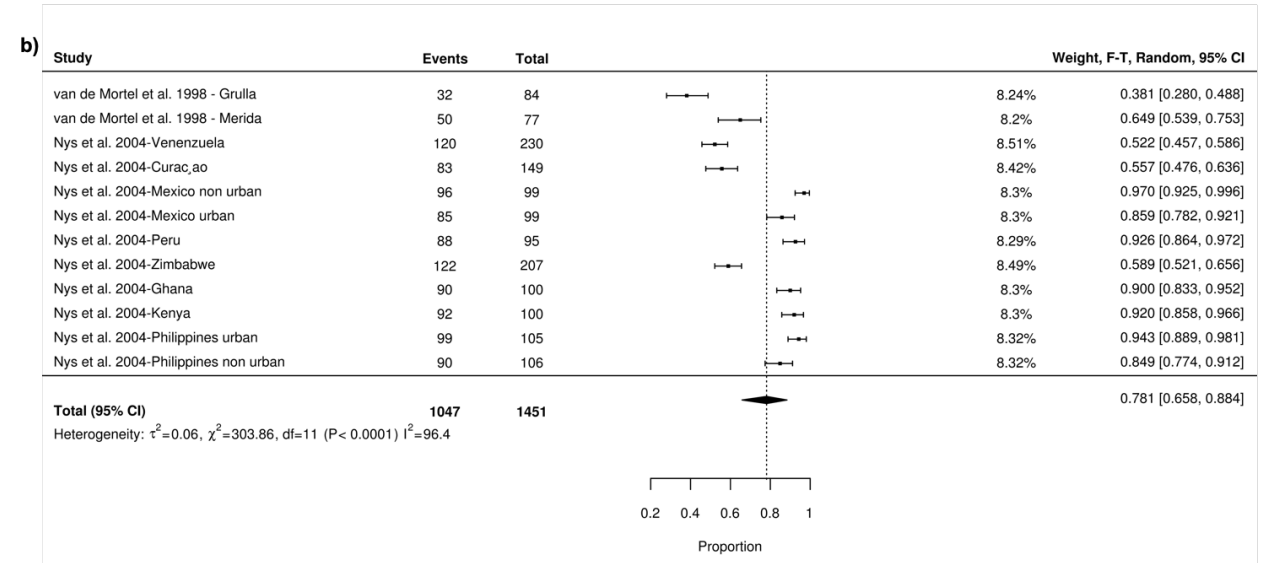

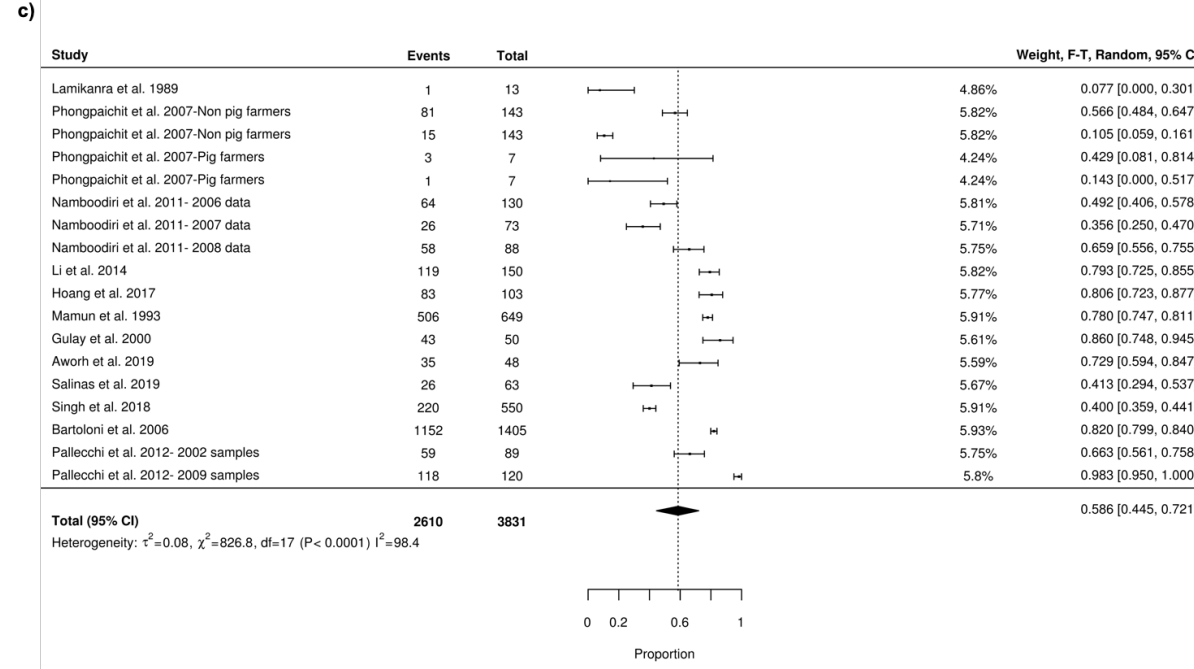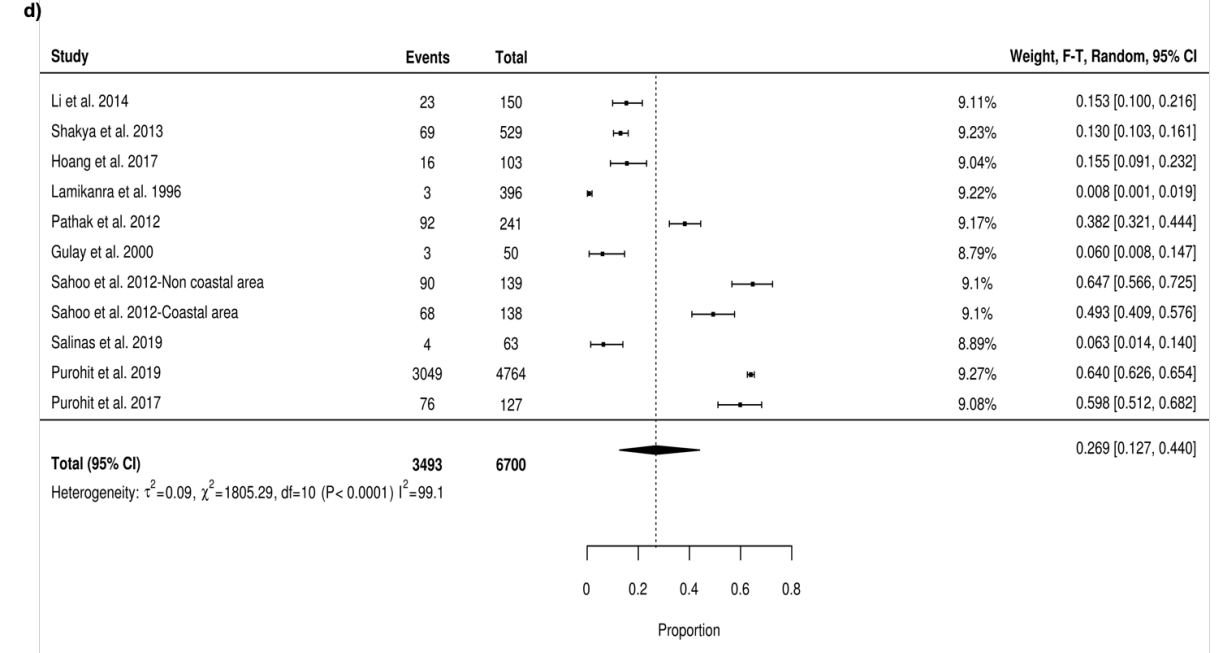



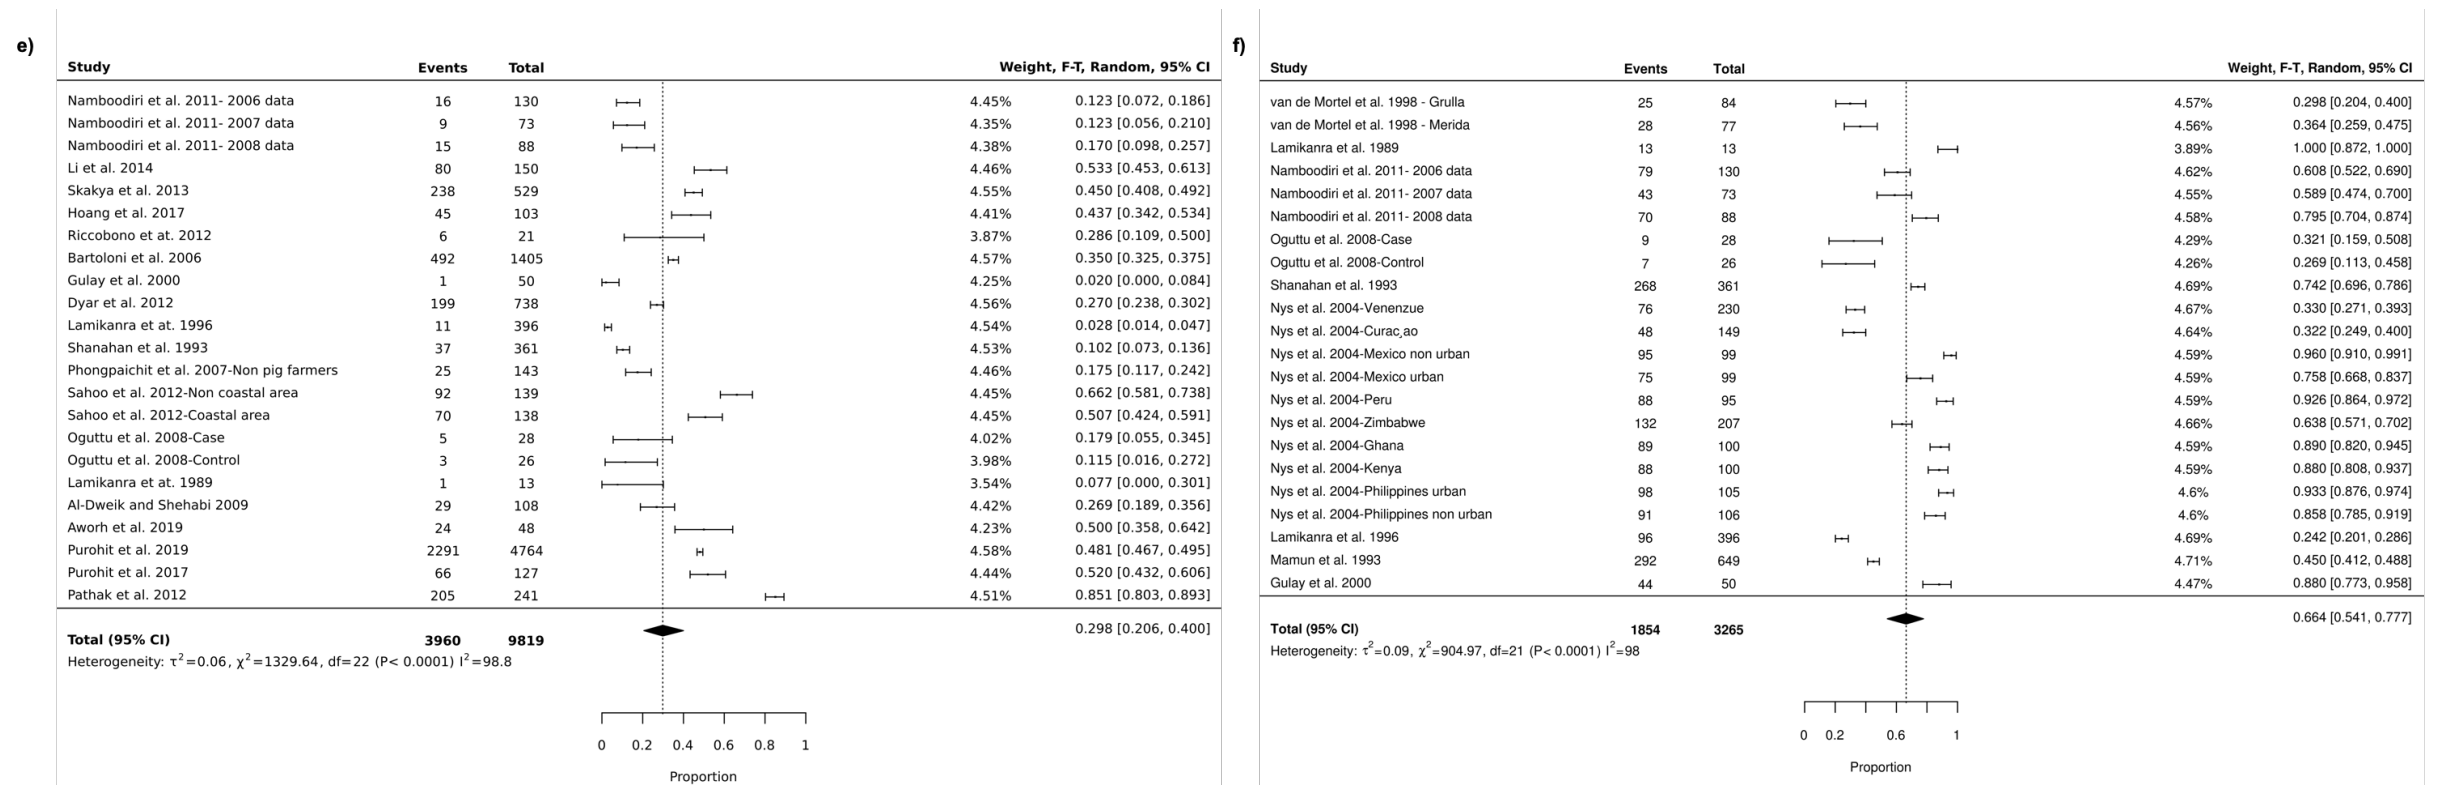

**Supplementary Figure 1. Forest plots showing the prevalence of antibiotic resistance in commensal *E. coli* isolated from human sources in community settings in low- and middle-income countries. Protein synthesis inhibitor a) chloramphenicol, b) oxytetracycline, and c) streptomycin. d) Cell wall synthesis inhibitor (cefotaxime), e) Nucleic acid synthesis inhibitor (nalidixic acid), and f) Folate synthesis inhibitor (trimethoprim).**

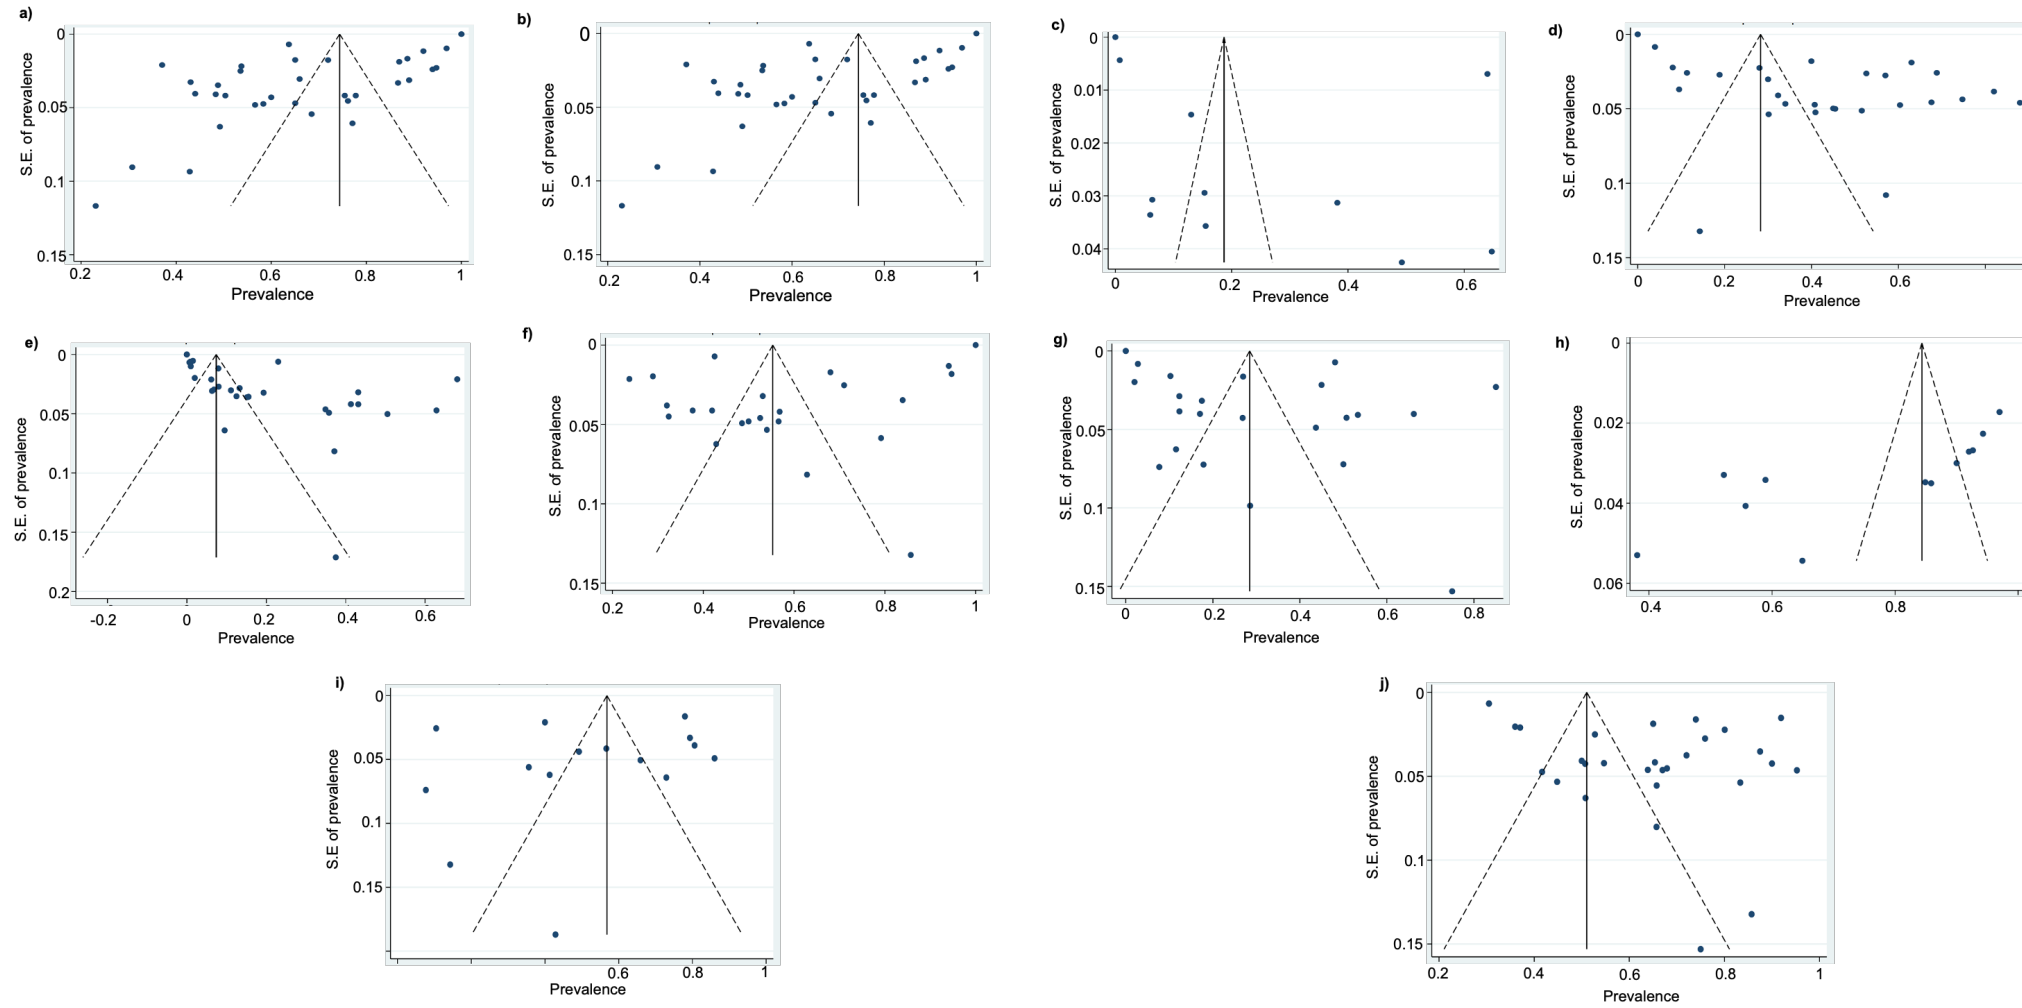

**Supplementary Figure 2. Funnel plots for antibiotic resistance in commensal *E. coli* isolated from human sources in community settings in low- and middle-income countries, a) ampicillin, b) cefotaxime, c) chloramphenicol, d) ciprofloxacin, e) co-trimoxazole, f) nalidixic acid, g) oxytetracycline, h) streptomycin, and i) tetracycline.**

**Supplementary Table 5. Table showing the Egger's regression test results of the top ten antibiotics commonly prescribed in low- and middle-income countries.**

| Antibiotic              | Number of studies | Egger bias | P value      |
|-------------------------|-------------------|------------|--------------|
| All the ten antibiotics | 221               | 9.28       | <b>0.00</b>  |
| Ampicillin              | 34                | 3.50       | 0.145        |
| Cefotaxime              | 10                | 6.97       | 0.583        |
| Chloramphenicol         | 27                | 10.17      | <b>0.002</b> |
| Ciprofloxacin           | 29                | 6.10       | <b>0.016</b> |
| Co-trimoxazole          | 23                | 1.13       | 0.753        |
| Nalidixic acid          | 22                | 0.955      | 0.811        |
| Oxytetracycline         | 12                | 14.40      | <b>0.002</b> |
| Streptomycin            | 15                | -2.20      | 0.575        |
| Tetracycline            | 28                | 7.71       | <b>0.007</b> |
| Trimethoprim            | 21                | -3.06      | 0.562        |

Note: Confidence interval - 95%

## References

1. Storberg, V. ESBL-producing *Enterobacteriaceae* in Africa – a non-systematic literature review of research published 2008–2012. *Infect. Ecol. Epidemiol.* **4**, 20342 (2014).
2. Hedin, A. & Källestål, C. in *Knowledge-based public health work Part 2, National institute of public health, Stockholm (2004)*.
3. Li, B. *et al.* Antimicrobial resistance and integrons of commensal *Escherichia coli* strains from healthy humans in China. *J. Chemother. Florence Italy* **26**, 190–192 (2014).
4. Shakya, P. *et al.* Antibiotic resistance among *Escherichia coli* isolates from stool samples of children aged 3 to 14 years from Ujjain, India. *BMC Infect. Dis.* **13**, 477 (2013).
5. Gulay, Z., Bicmen, M., Amyes, S. G. & Yulug, N. Beta-lactamase patterns and betalactam/clavulanic acid resistance in *Escherichia coli* isolated from fecal samples from healthy volunteers. *J. Chemother. Florence Italy* **12**, 208–215 (2000).
6. Riccobono, E. *et al.* Carriage of antibiotic-resistant *Escherichia coli* among healthy children and home-raised chickens: a household study in a resource-limited setting. *Microb. Drug Resist. Larchmt. N* **18**, 83–87 (2012).
7. Al-Dweik, M. R. & Shehabi, A. A. Common antimicrobial resistance phenotypes and genotypes of fecal *Escherichia coli* isolates from a single family over a 6-month period. *Microb. Drug Resist. Larchmt. N* **15**, 103–107 (2009).
8. Sahoo, K. C. *et al.* Geographical variation in antibiotic-resistant *Escherichia coli* isolates from stool, cow-dung and drinking water. *Int. J. Environ. Res. Public. Health* **9**, 746–759 (2012).
9. Purohit, M. R., Lindahl, L. F., Diwan, V., Marrone, G. & Lundborg, C. S. High levels of drug resistance in commensal *E. coli* in a cohort of children from rural central India. *Sci. Rep.* **9**, 6682 (2019).
10. Bartoloni, A. *et al.* High prevalence of acquired antimicrobial resistance unrelated to heavy antimicrobial consumption. *J. Infect. Dis.* **189**, 1291–1294 (2004).
11. Bartoloni, A. *et al.* Patterns of antimicrobial use and antimicrobial resistance among healthy children in Bolivia. *Trop. Med. Int. Health* **3**, 116–123 (1998).
12. Phongpaichit, S., Liamthong, S., Mathew, A. G. & Chethanond, U. Prevalence of class 1 integrons in commensal *Escherichia coli* from pigs and pig farmers in Thailand. *J. Food Prot.* **70**, 292–299 (2007).
13. Purohit, M. *et al.* Antibiotic Resistance in an Indian Rural Community: A ‘One-Health’ Observational Study on Commensal Coliform from Humans, Animals, and Water. *Int. J. Environ. Res. Public. Health* **14**, 386 (2017).
14. van de Mortel, H. J. *et al.* The prevalence of antibiotic-resistant faecal *Escherichia coli* in healthy volunteers in Venezuela. *Infection* **26**, 292–297 (1998).
15. Salinas, L. *et al.* Diverse Commensal *Escherichia coli* Clones and Plasmids Disseminate Antimicrobial Resistance Genes in Domestic Animals and Children in a Semirural Community in Ecuador. *mSphere* **4**, (2019).
16. Qiu, J. *et al.* Molecular and Phenotypic Characteristics of *Escherichia coli* Isolates from Farmed Minks in Zhucheng, China. *BioMed Res. Int.* **2019**, 3917841 (2019).

17. DeFrancesco, A. S., Tanih, N. F., Samie, A., Guerrant, R. L. & Bessong, P. O. Antibiotic resistance patterns and beta-lactamase identification in *Escherichia coli* isolated from young children in rural Limpopo Province, South Africa: The MAL-ED cohort. *South Afr. Med. J. Suid-Afr. Tydskr. Vir Geneesk.* **107**, 205–214 (2017).
18. Nys, S. *et al.* Antibiotic resistance of faecal *Escherichia coli* from healthy volunteers from eight developing countries. *J. Antimicrob. Chemother.* **54**, 952–955 (2004).
19. Singh, A. K. *et al.* Prevalence of antibiotic resistance in commensal *Escherichia coli* among the children in rural hill communities of Northeast India. *PloS One* **13**, e0199179 (2018).
20. Chirindze, L. M. *et al.* Faecal colonization of *E. coli* and *Klebsiella* spp. producing extended-spectrum beta-lactamases and plasmid-mediated AmpC in Mozambican university students. *BMC Infect. Dis.* **18**, 244 (2018).
21. Hoang, P. H. *et al.* Antimicrobial resistance profiles and molecular characterization of *Escherichia coli* strains isolated from healthy adults in Ho Chi Minh City, Vietnam. *J. Vet. Med. Sci.* **79**, 479–485 (2017).
22. Newman, M. J. & Seidu, A. Carriage of antimicrobial resistant *Escherichia coli* in adult intestinal flora. *West Afr. J. Med.* **21**, 48–50 (2002).
23. Oguttu, J. W., Veary, C. M. & Picard, J. A. Antimicrobial drug resistance of *Escherichia coli* isolated from poultry abattoir workers at risk and broilers on antimicrobials. *J. S. Afr. Vet. Assoc.* **79**, 161–166 (2008).
24. Pathak, A. *et al.* Factors associated with carriage of multi-resistant commensal *Escherichia coli* among postmenopausal women in Ujjain, India. *Scand. J. Infect. Dis.* **44**, 973–977 (2012).
25. Kalter, H. D. *et al.* Risk factors for antibiotic-resistant *Escherichia coli* carriage in young children in Peru: community-based cross-sectional prevalence study. *Am. J. Trop. Med. Hyg.* **82**, 879–888 (2010).
26. Thi Quynh Nhi, L. *et al.* Excess body weight and age associated with the carriage of fluoroquinolone and third-generation cephalosporin resistance genes in commensal *Escherichia coli* from a cohort of urban Vietnamese children. *J. Med. Microbiol.* **67**, 1457–1466 (2018).
27. Shanahan, P. M. *et al.* The prevalence of antimicrobial resistance in human faecal flora in South Africa. *Epidemiol. Infect.* **111**, 221–228 (1993).
28. Bartoloni, A. *et al.* Multidrug-resistant Commensal *Escherichia coli* in Children, Peru and Bolivia. *Emerg. Infect. Dis.* **12**, 907–913 (2006).
29. Aworh, M. K., Kwaga, J., Okolocha, E., Mba, N. & Thakur, S. Prevalence and risk factors for multi-drug resistant *Escherichia coli* among poultry workers in the Federal Capital Territory, Abuja, Nigeria. *PloS One* **14**, e0225379 (2019).
30. Lamikanra, A., Fayinka, S. T. & Olusanya, O. O. Transfer of low level trimethoprim resistance in faecal isolates obtained from apparently healthy Nigerian students. *FEMS Microbiol. Lett.* **59**, 275–278 (1989).
31. Lamikanra, A., Ako-Nai, A. K. & Ogunniyi, D. A. Transferable antibiotic resistance in *Escherichia coli* isolated from healthy Nigerian school children. *Int. J. Antimicrob. Agents* **7**, 59–64 (1996).
32. Namboodiri, S. S., Opintan, J. A., Lijek, R. S., Newman, M. J. & Okeke, I. N. Quinolone resistance in *Escherichia coli* from Accra, Ghana. *BMC Microbiol.* **11**, 44 (2011).
33. Mamun, K. Z., Shears, P. & Hart, C. A. The prevalence and genetics of resistance to commonly used antimicrobial agents in faecal Enterobacteriaceae from children in Bangladesh. *Epidemiol. Infect.* **110**, 447–458 (1993).
